# Supplementary material
Source: PubMed Central journal article supplement (PMC4672150)
Supplement: supp_cwv083_cwv083supp.pdf [file supp_cwv083_cwv083supp.pdf]

## Supplementary Material

### Preferred Conformations of N-glycan Core Pentasaccharide in Solution and in Glycoproteins

Sunhwan Jo<sup>1†</sup>, Yifei Qi<sup>2†</sup>, and Wonpil Im<sup>2\*</sup>

<sup>1</sup>Leadership Computing Center, Argonne National Laboratory, 9700 Cass Ave Bldg. 240,  
Argonne, IL 60439, USA

<sup>2</sup>Department of Molecular Biosciences and Center for Computational Biology, The University of  
Kansas, 2030 Becker Drive, Lawrence, KS 66047, USA

Running Title: Pentasaccharide conformations in solution and glycoprotein

Key words: glycan, molecular dynamics, simulation, crystal structure, information theory

---

<sup>†</sup> Contributed equally to this work

\* Corresponding author: Phone: (785) 864-1993; Fax: (785) 864-5558; E-mail: wonpil@ku.edu

**Table S1.** Calculated inter-proton inter-residue distances from the simulation. The distances are

calculated by using the formula,  $\langle r^{-6} \rangle = \left\langle \frac{1}{N} \sum_i r_i(t)^{-6} \right\rangle$ . The NMR experimental inter-proton

distances are taken from literatures.

| Linkage                   | Proton Pair                      | Distance (Å) | NMR Experiments                |
|---------------------------|----------------------------------|--------------|--------------------------------|
| $\beta(1 \rightarrow 4)$  |                                  |              |                                |
| 2-1                       | H <sub>1</sub> /H <sub>2</sub> ' | 4.7          |                                |
|                           | H <sub>1</sub> /H <sub>3</sub> ' | 3.5          |                                |
|                           | H <sub>1</sub> /H <sub>4</sub> ' | 2.3          | 1.8-2.7 [1]                    |
|                           | H <sub>1</sub> /H <sub>5</sub> ' | 4.0          |                                |
|                           | H <sub>1</sub> /H <sub>6</sub> ' | 3.1          |                                |
|                           | H <sub>1</sub> /H <sub>6</sub> ' | 3.0          |                                |
| 3-2                       | H <sub>1</sub> /H <sub>2</sub> ' | 4.7          |                                |
|                           | H <sub>1</sub> /H <sub>3</sub> ' | 3.7          |                                |
|                           | H <sub>1</sub> /H <sub>4</sub> ' | 2.3          | 1.8-2.7 [1]                    |
|                           | H <sub>1</sub> /H <sub>5</sub> ' | 4.1          |                                |
|                           | H <sub>1</sub> /H <sub>6</sub> ' | 3.2          | 3.3-5.0 [1]                    |
|                           | H <sub>1</sub> /H <sub>6</sub> ' | 3.0          | 3.3-5.0 [1]                    |
| $\alpha(1 \rightarrow 3)$ |                                  |              |                                |
| A-3                       | H <sub>1</sub> /H <sub>1</sub> ' | 4.6          | 3.3 [2]                        |
|                           | H <sub>1</sub> /H <sub>2</sub> ' | 3.5          | 3.1 [2]; 3.08 [3]              |
|                           | H <sub>1</sub> /H <sub>3</sub> ' | 2.2          | 2.1-2.3 [4]; 2.36 [5]          |
|                           | H <sub>1</sub> /H <sub>4</sub> ' | 3.9          | 3.0 [2]; 2.97 [5]              |
|                           | H <sub>1</sub> /H <sub>5</sub> ' | 4.4          |                                |
| $\alpha(1 \rightarrow 6)$ |                                  |              |                                |
| A'-3                      | H <sub>1</sub> /H <sub>4</sub> ' | 4.2          |                                |
|                           | H <sub>1</sub> /H <sub>5</sub> ' | 3.6          | 3.3 [2]; 3.3-5.0 [1]           |
|                           | H <sub>1</sub> /H <sub>6</sub> ' | 2.3          | 2.4 [2]; 2.54 [5]; 1.8-2.7 [1] |
|                           | H <sub>1</sub> /H <sub>6</sub> ' | 2.9          | 2.8 [2]                        |

**Table S2.** Conformational states of the N-glycan core pentasaccharide in glycoprotein from MD simulations. The initial conformational states are highlighted as bold.

|     | PDB:1E04     |       | PDB:1CXP     |       | PDB:1L6X     |       | PDB:1RRB     |       |
|-----|--------------|-------|--------------|-------|--------------|-------|--------------|-------|
| #1  | <b>AAAAG</b> | 56.3% | <b>AAAAG</b> | 53.9% | <b>AAAAG</b> | 67.6% | <b>AAAAG</b> | 67.2% |
| #2  | AAAAG        | 25.7% | AAAAG        | 31.5% | AAAAG        | 12.9% | AAAAG        | 14.3% |
| #3  | AAABG        | 6.3%  | AAABg        | 3.6%  | AAABG        | 11.9% | BAAAG        | 5.8%  |
| #4  | BAAAG        | 3.7%  | AAABG        | 3.5%  | AAABg        | 6.8%  | AAABG        | 4.7%  |
| #5  | ABAAG        | 3.0%  | ABAAG        | 3.4%  | BAAAG        | 0.5%  | BAAAg        | 4.1%  |
| #6  | AAABg        | 2.1%  | ABAAG        | 1.1%  | AABAG        | 0.1%  | ABAAG        | 1.7%  |
| #7  | ABAAG        | 0.9%  | ABABG        | 0.8%  | ABAAG        | 0.0%  | AAABg        | 1.0%  |
| #8  | BAAAg        | 0.8%  | BAAAG        | 0.6%  | AABBG        | 0.0%  | BAABg        | 0.5%  |
| #9  | BAABG        | 0.4%  | AAAAt        | 0.5%  | ABAAG        | 0.0%  | BAABG        | 0.4%  |
| #10 | ABABG        | 0.2%  | BAAAg        | 0.3%  | BAABG        | 0.0%  | AAAAt        | 0.1%  |
| Sum |              | 99.1% |              | 99.3% |              | 92.8% |              | 94%   |

## FIGURE LEGENDS

**Figure S1.** Efficient random walk across temperature space in the T-REXMD simulation. (A) Time series of temperature exchanges of two arbitrarily chosen replicas: replica #1 (red) and replica #48 (green). (B) Time series of different replicas visiting at temperature 300 K.

**Figure S2.** Torsion angle distribution for the first three glycosidic linkages. (A) GlcNAc  $\beta(1\rightarrow4)$  GlcNAc, (B) Man  $\beta(1\rightarrow4)$  GlcNAc, and (C) Man  $\alpha(1\rightarrow3)$  Man.

**Figure S3.** Torsion angle distributions for the Man  $\alpha(1\rightarrow6)$  Man glycosidic linkage.

**Figure S4.** Cumulative average of conformational state population for the top five conformational states in Table 2. Each colored line represents the population of a particular conformational state.

**Figure S5.** Cumulative average populations of the top five conformational states. The aggregated MD simulation trajectory was used. Each colored line represents the population of a particular conformational state.

**Figure S6.** Conformational variability of the pentasaccharide in solution. (A) The pair-wise RMSD distribution from the standard MD simulations. (B) Conformational variability within each of the major conformational states. Each colored line represents a pair-wise RMSD distribution from 1,000 conformers belonging to the same conformational state.

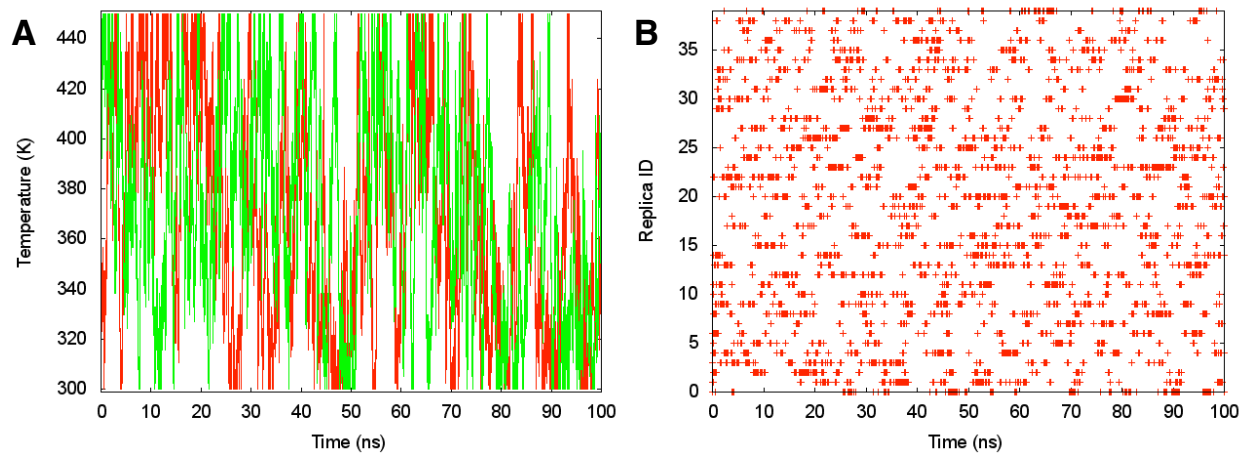

**Figure S1.** Efficient random walk across temperature space in the T-REXMD simulation. (A) Time series of temperature exchanges of two arbitrarily chosen replicas: replica #1 (red) and replica #48 (green). (B) Time series of different replicas visiting at temperature 300 K.

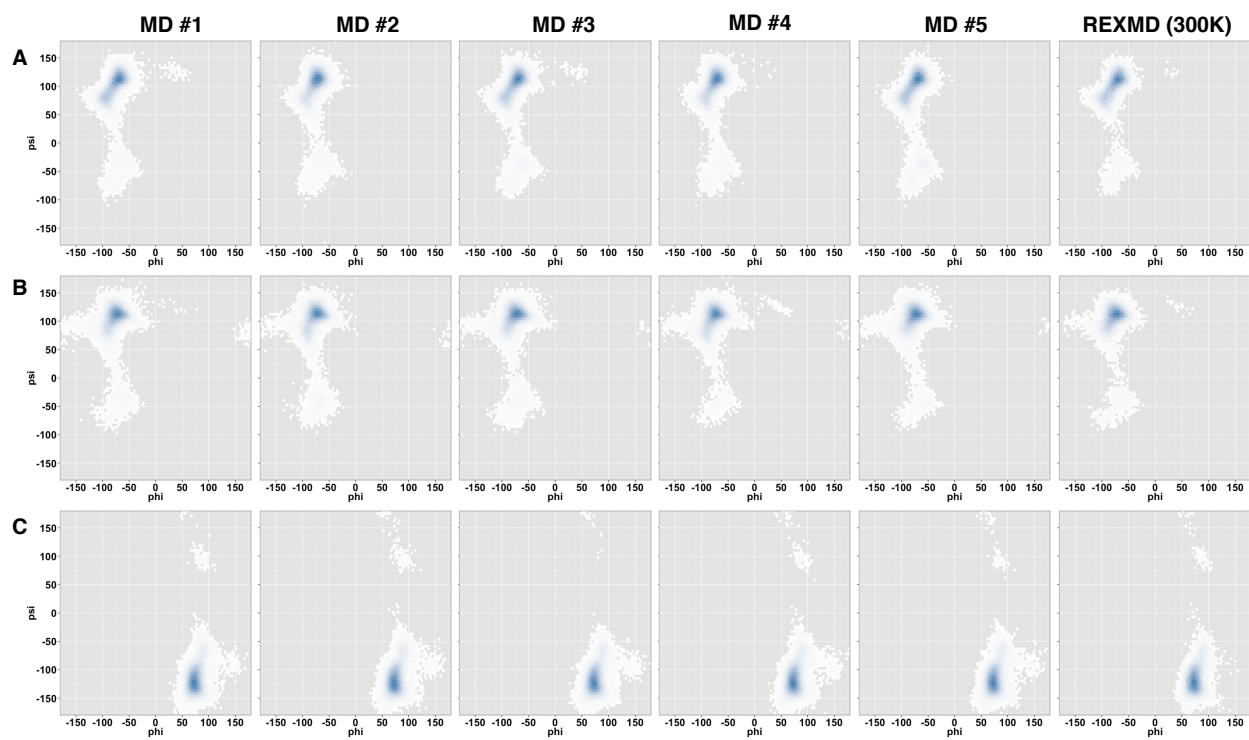

**Figure S2.** Torsion angle distributions for the first three glycosidic linkages: (A) GlcNAc  $\beta(1\rightarrow4)$  GlcNAc, (B) Man  $\beta(1\rightarrow4)$  GlcNAc, and (C) Man  $\alpha(1\rightarrow3)$  Man.

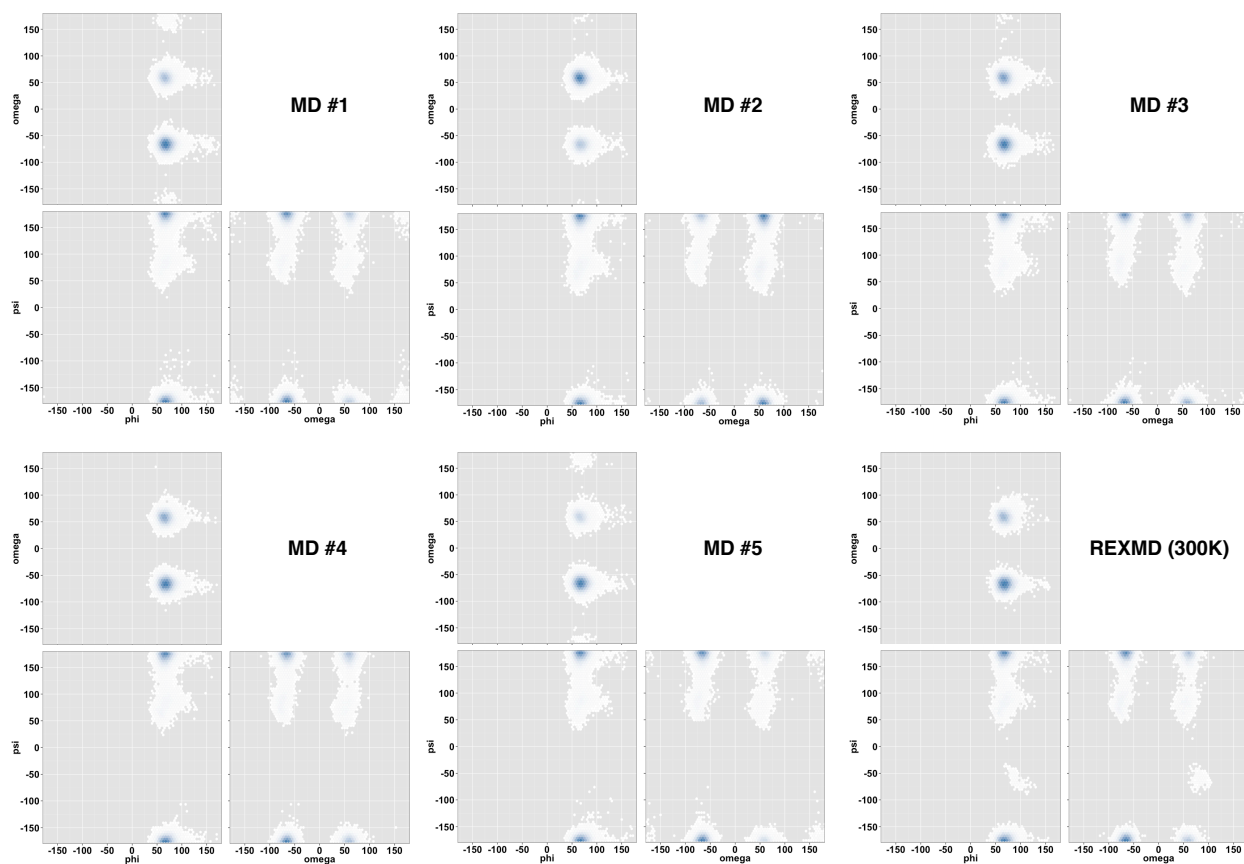

**Figure S3.** Torsion angle distributions for the Man  $\alpha(1 \rightarrow 6)$  Man glycosidic linkage.

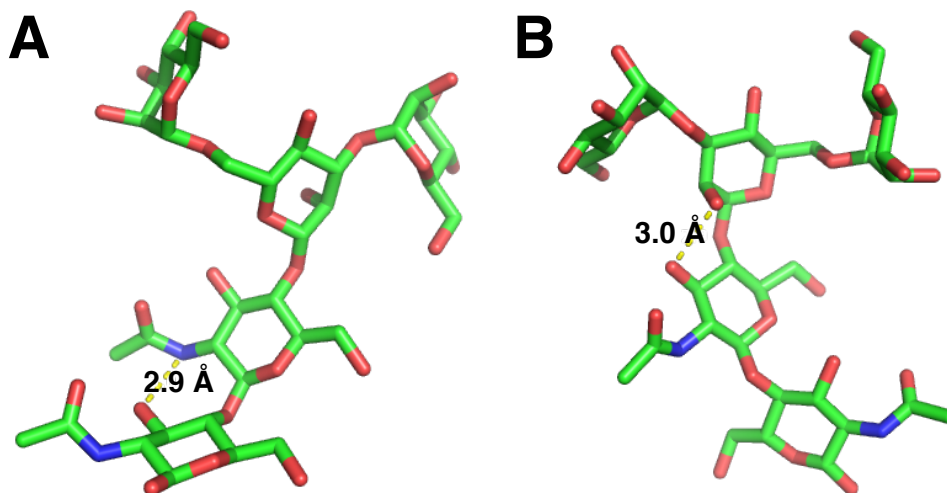

**Figure S4.** Two examples of less favorable exo-anomeric populations; (A) CAAAG conformational state and (B) ACAAG conformational state. The hydrogen bond formed that stabilizes the conformation is highlighted as yellow lines.



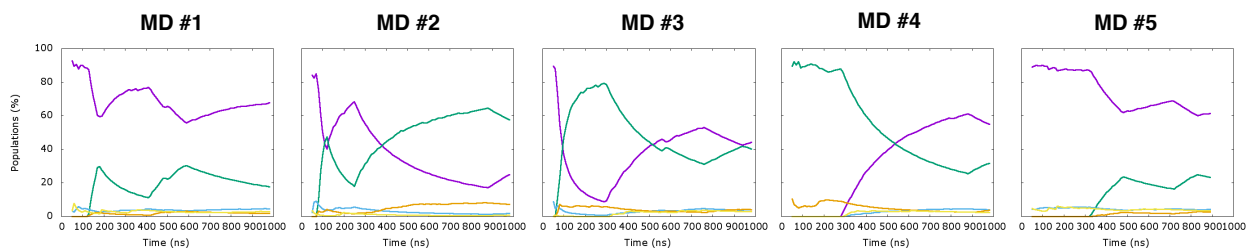

**Figure S5.** Cumulative average populations of the top five conformational states in Table 2. Each colored line represents the population of a particular conformational state.

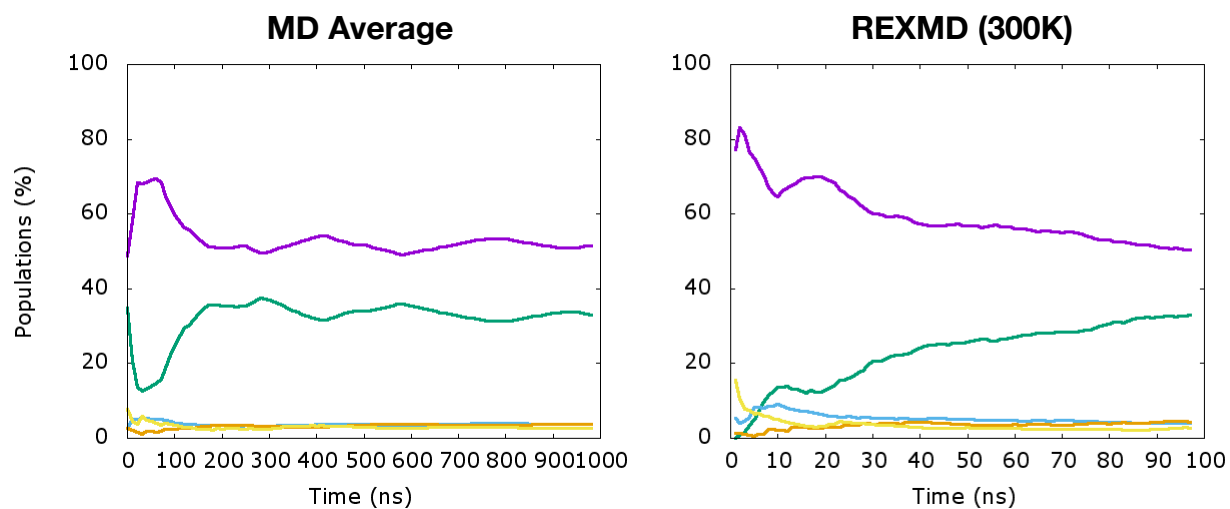

**Figure S6.** Cumulative average populations of the top five conformational states. The aggregated MD simulation trajectory was used. Each colored line represents the population of a particular conformational state.

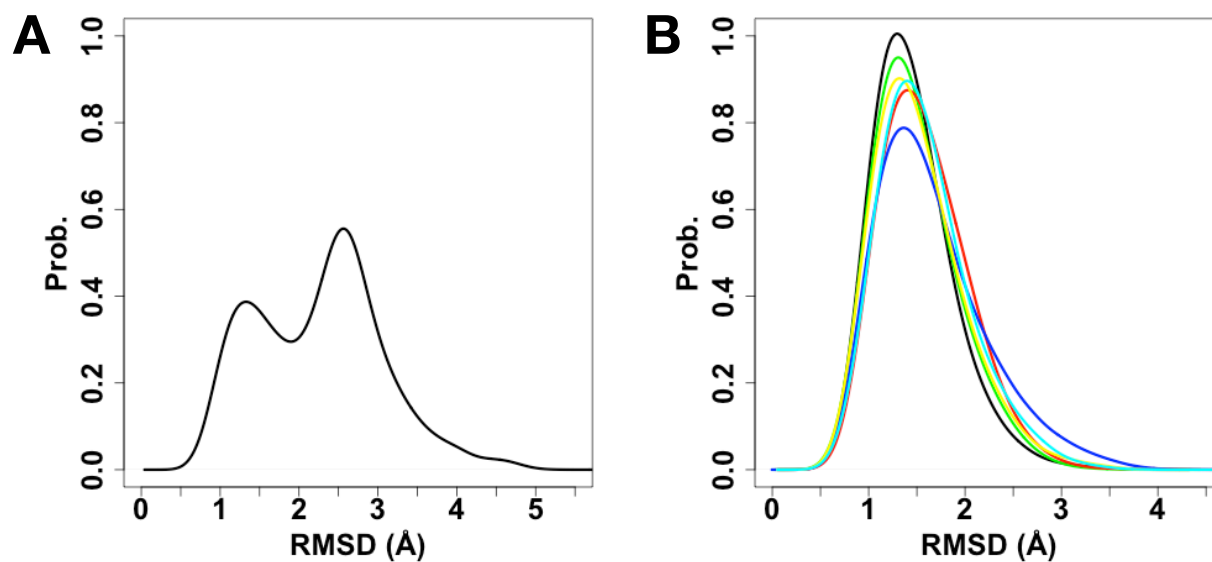

**Figure S7.** Conformational variability of the pentasaccharide in solution. (A) The pair-wise RMSD distribution from the standard MD simulations. (B) Conformational variability within each of the major conformational states. Each colored line represents a pair-wise RMSD distribution from 1,000 conformers belonging to the same conformational state.

## REFERENCES

1. Weller, C.T., et al., *Structural and conformational analysis of glycan moieties in situ on isotopically <sup>13</sup>C, <sup>15</sup>N-enriched recombinant human chorionic gonadotropin*. *Biochemistry*, 1996. **35**(27): p. 8815--8823.
2. Woods, R.J., et al., *The high degree of internal flexibility observed for an oligomannose oligosaccharide does not alter the overall topology of the molecule*. *Eur. J. Biochem.*, 1998. **258**(2): p. 372-386.
3. Homans, S.W., R.A. Dwek, and T.W. Rademacher, *Tertiary structure in N-linked oligosaccharides*. *Biochemistry*, 1987. **26**(20): p. 6560.
4. Petrescu, A.J., et al., *The solution NMR structure of glucosylated N-glycans involved in the early stages of glycoprotein biosynthesis and folding*. *EMBO J.*, 1997. **16**(14): p. 4302-4310.
5. Sayers, E.W. and J.H. Prestegard, *Solution Conformations of a Trimannoside from Nuclear Magnetic Resonance and Molecular Dynamics Simulations*. *Biophysj*, 2000. **79**(6): p. 3313-3329.
